# Supplementary material for: In vivo formation of protein corona on gold nanoparticles. The effect of their size and shape
Source: Royal Society of Chemistry journal article supplement (doi:10.1039/c7nr08322j), 2017-12-07
Supplement: c7nr08322j1.pdf [file c7nr08322j1.pdf]

# **ELECTRONIC SUPPLEMENTARY** **INFORMATION**

## *In Vivo Formation of Protein Corona on Gold Nanoparticles. The effect of Size and Shape*

Rafaela García-Álvarez<sup>a,b</sup>, Marilena Hadjidemetriou<sup>a</sup>, Ana Sánchez-Iglesias<sup>b</sup>, Luis M Liz-Marzán<sup>b,c,d\*</sup> and Kostas Kostarelos<sup>a\*</sup>

<sup>a</sup> Nanomedicine Lab, Faculty of Biology, Medical & Health, The University of Manchester, Manchester M13 9PT, United Kingdom

<sup>b</sup> Bionanoplasmonics Laboratory, CIC biomaGUNE, Paseo de Miramón182, 20014 Donostia-San Sebastián, Spain.

<sup>c</sup> Ikerbasque, Basque Foundation for Science, 48013 Bilbao, Spain.

<sup>d</sup> Ciber de Bioingeniería, Biomateriales y Nanomedicina, Ciber-BBN, 20014 Donostia-San Sebastián, Spain.

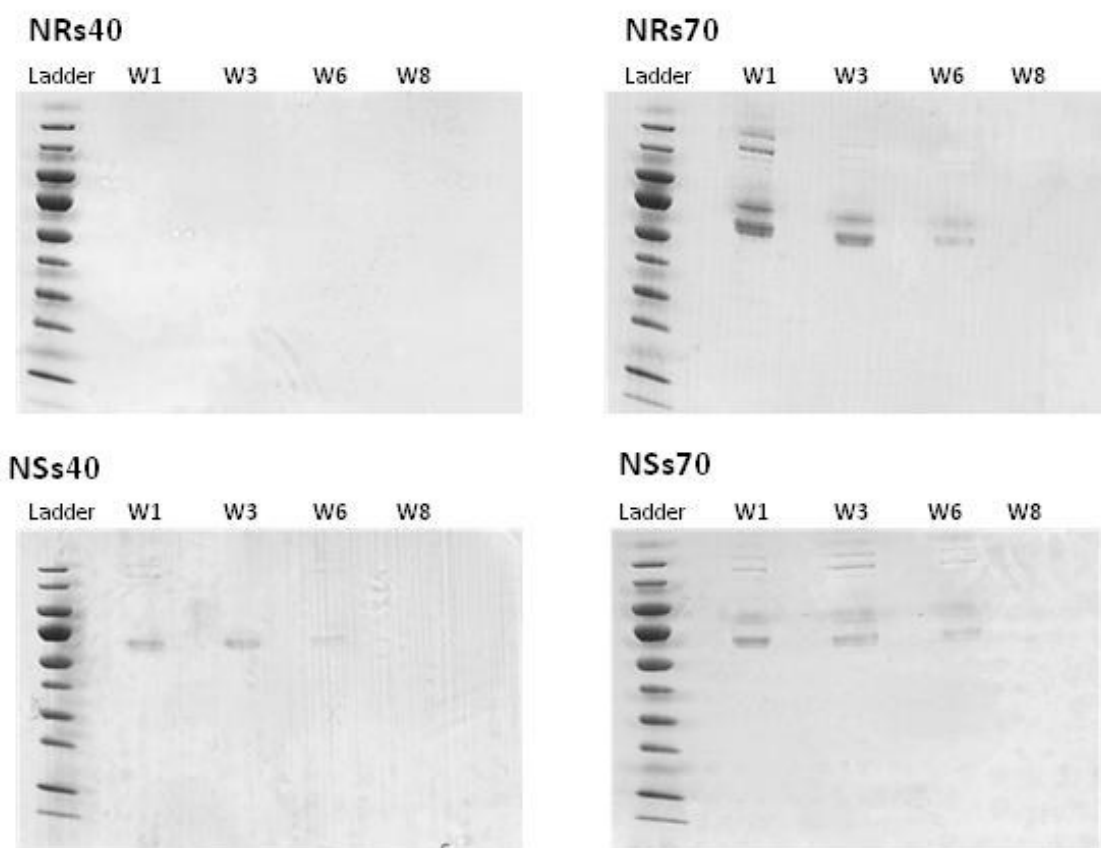

**Fig. S1** Second purification step: Large unbound proteins present in chromatographic fractions 4,5,6 as well as loosely bound proteins were separated from AuNPs by membrane ultrafiltration (Viva Spin Column-1000000 MWCO). Imperial Protein stained SDS-PAGE shows that any remaining proteins in chromatographic fractions 4,5 and 6 were removed to the filtrate of Viva Spin (Washing steps 1 to 8) and no free proteins were detected at the last washing step.

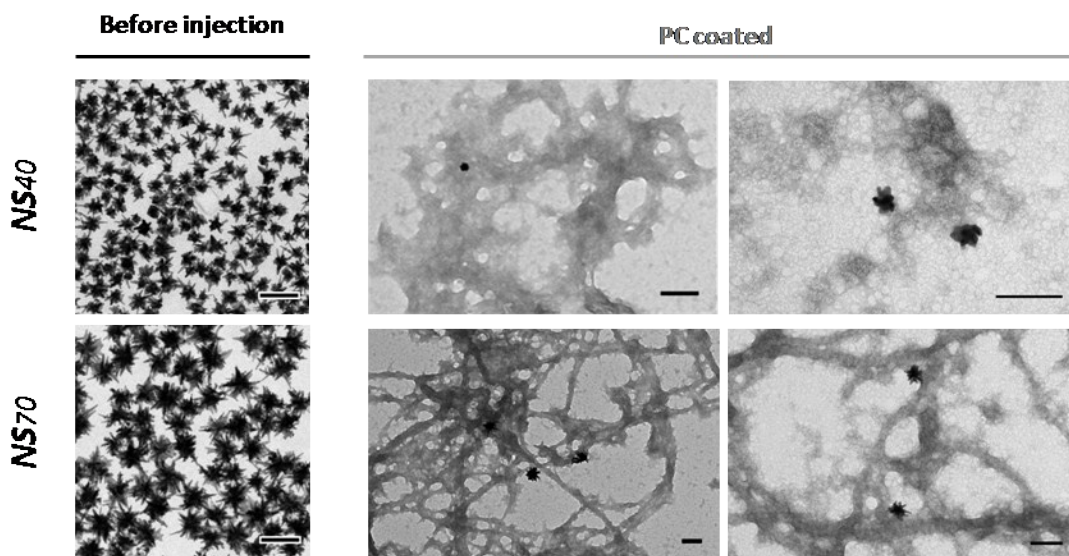

**Fig. S2** TEM images showing that AuNSs of 40nm partially reshape after *in vivo* incubation, whereas AuNSs 70nm retain sharp tips.

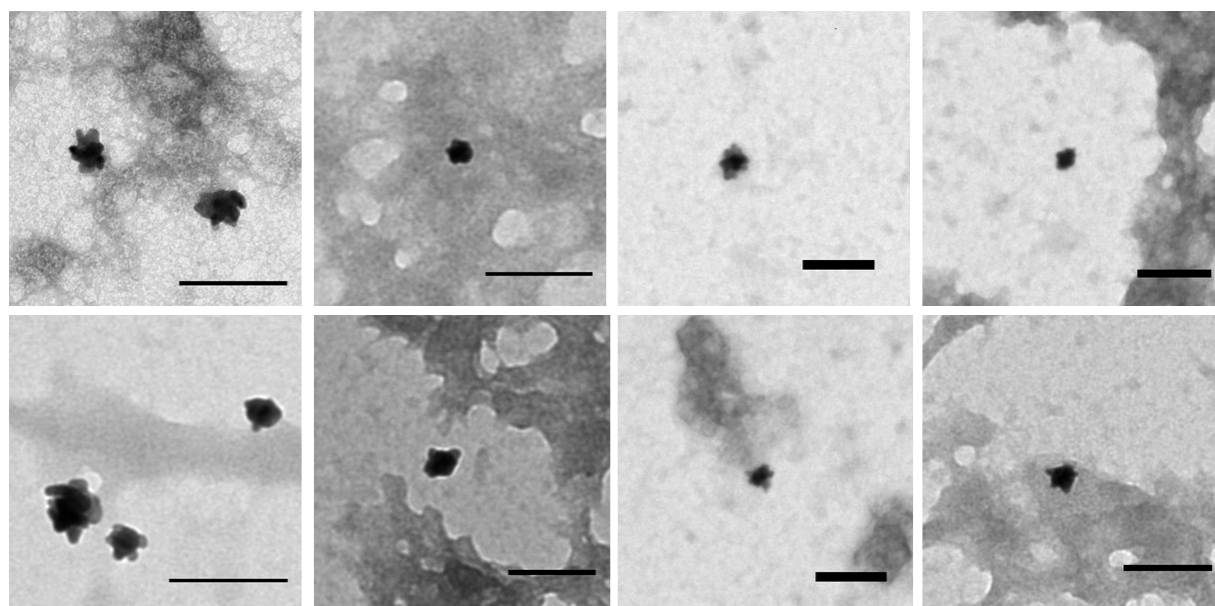

**Fig. S3** TEM images showing reshaping of 40nm AuNSs after *in vivo* incubation (n=11). Scale bars are 100 nm.

**Table S1** Effect of *in vivo* protein corona formation on the physico-chemical properties of AuNPs before and after interaction with proteins: Mean diameter (nm),  $\zeta$ -potential (mV) and PDI.

|                         | NRs <sub>40</sub> |             | NSs <sub>40</sub> |             | NRs <sub>70</sub> |             | NSs <sub>70</sub> |             |
|-------------------------|-------------------|-------------|-------------------|-------------|-------------------|-------------|-------------------|-------------|
|                         | Bare              | PC          | Bare              | PC          | Bare              | PC          | Bare              | PC          |
| H <sub>0</sub> (nm)     | 21.25±0.03        | 83.28±7.50  | 82.09±2.70        | 79.98±0.70  | 24.91±0.34        | 75.67±6.24  | 122.00±1.31       | 93.36±4.84  |
| $\zeta$ -potential (mV) | -28.57±0.55       | -36.76±2.05 | -29.33±0.23       | -31.78±2.89 | -28.77±0.38       | -20.32±0.95 | -33.63±0.21       | -18.88±0.44 |
| PDI                     | 0.786±0.002       | 0.315±0.088 | 0.245±0.008       | 0.232±0.080 | 0.378±0.003       | 0.388±0.110 | 0.101±0.007       | 0.388±0.017 |

**Table S2** Amount of gold per sample ( $\mu\text{g Au/L}$ ) obtained by ICP-MS for *in vivo* PC-AuNPs.

|            | ICP-MS             |
|------------|--------------------|
|            | $\mu\text{g Au/L}$ |
| Rods 40 a  | 22.02              |
| Rods 40 b  | 22.15              |
| Rods 40 c  | 20.02              |
| Stars 40 a | 25.48              |
| Stars 40 b | 33.69              |
| Stars 40 c | 37.93              |
| Rosd 70 a  | 28.09              |
| Rods 70 b  | 33.72              |
| Rods 70 c  | 28.32              |
| Stars 70 a | 27.57              |
| Stars 70 b | 25.70              |
| Stars 70 c | 27.32              |
